# Supplementary material for: Exploring the Association between Delirium and Malnutrition in COVID-19 Survivors: A Geriatric Perspective
Source: MDPI journal article supplement (doi:10.3390/nu15224727), 2023-11-09
Supplement: s1 [file s1]

## Supplementary Tables

*Table S1: modified GLIM criteria*

### PHENOTYPIC CRITERIA

Weight loss > 5% in the last 6 months or > 10% beyond 6 months

Low BMI: < 20 if age < 70 years or < 22 if age > 70 years

### ETIOLOGIC CRITERIA

Reduced food intake or assimilation

Inflammation: acute disease or chronic disease

*Table S2: Variables included in the computation of the frailty index*

| Variables included in the computation of the frailty index |
|------------------------------------------------------------|
| Istitutionalized                                           |
| Hypertension                                               |
| Diabetes                                                   |
| Dyslipidemia                                               |
| Coronary artery disease                                    |
| Atrial fibrillation                                        |
| Heart Failure                                              |
| Pulmonary Embolism/Deep venous thrombosis                  |
| Asthma                                                     |
| Stroke/TIA                                                 |
| Parkinson                                                  |
| Alzheimer                                                  |
| Other dementia                                             |
| Other neurologic disorders                                 |
| Arthrosis                                                  |
| Depression                                                 |
| Hepatic disease                                            |
| Anemia (chronic)                                           |
| myelodysplastic syndrome/myeloproliferative syndrome       |
| Solid tumor                                                |
| taking psychoactive drugs                                  |
| polytherapy                                                |
| Chronic ACB score elevated                                 |
| Any ACB elevated during hospital stay                      |
| Any Na high or low                                         |
| Any SO <sub>2</sub> /FiO <sub>2</sub> moderately altered   |
| Any K low or high                                          |
| Any ANEMIA of moderate degree                              |
| Any glycemia > 200 mg/dl                                   |

*Table S3: evaluations performed during the study*

|                               | Hospital admission                                                                 | Hospital stay | One month after hospital discharge |
|-------------------------------|------------------------------------------------------------------------------------|---------------|------------------------------------|
| MUST                          | x                                                                                  |               |                                    |
| GLIM criteria of malnutrition | x                                                                                  |               | x                                  |
| MNA-SF                        |                                                                                    |               | x                                  |
| 4AT                           | x                                                                                  | x             |                                    |
| Height                        |                                                                                    |               | x                                  |
| Weight                        |                                                                                    |               | x                                  |
| Calf circumference            |                                                                                    |               | x                                  |
| Waist circumference           |                                                                                    |               | x                                  |
| SARC-F                        |                                                                                    |               | x                                  |
| SPPB                          |                                                                                    |               | x                                  |
| 6MWT                          |                                                                                    |               | x                                  |
|                               |                                                                                    |               |                                    |
|                               |                                                                                    |               |                                    |
|                               |                                                                                    |               |                                    |
|                               |                                                                                    |               |                                    |
|                               |                                                                                    |               |                                    |
| <b>LEGEND</b>                 |                                                                                    |               |                                    |
| MUST                          | Malnutrition Universal Screening Tool                                              |               |                                    |
| GLIM                          | Modified Global Leadership Initiative on Malnutrition                              |               |                                    |
| MNA-SF                        | Mini-Nutritional Assessment Short Form                                             |               |                                    |
| SARC-F                        | Strength, Assistance with walking, Rising from a chair, Climbing stairs, and Falls |               |                                    |
| SPPB                          | Short Physical Performance Battery                                                 |               |                                    |
| 6MWT                          | 6-minute walk test                                                                 |               |                                    |
